# Supplementary material
Source: PubMed Central journal article supplement (PMC7126644)
Supplement: mmc2.pdf [file mmc2.pdf]

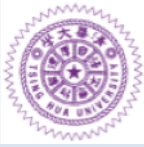

# National Tsing Hua University

**COLLEGE OF ENGINEERING**  
**Institute of Nanoengineering and Microsystems**

Hsinchu, 300 Taiwan, R.O.C.  
Telephone: 886-3- 5162405  
Fax: 886-3-574-54554  
E-mail: [ylwang@mx.nthu.edu.tw](mailto:ylwang@mx.nthu.edu.tw)

Nov. 6, 2012

Editorial Office  
Sensors and Actuators B: Chemical

Dear Dr. Tokeshi,

Please find enclosed a paper entitled "Investigation of C-terminal Domain of SARS Nucleocapsid Protein - Duplex DNA Interaction Using Transistors and Binding-Site Models", which we are submitting for consideration for Sensors and Actuators B: Chemical. We think the results will be of strong interest to the biosensor community. We also would like to suggest several potential reviewers for this paper.

Prof. Debbie Senesky  
Stanford University  
Department of Aeronautics and Astronautics  
Durand Building, MC 4035  
Stanford, CA 94305-4035  
E-mail: [dsenesky@stanford.edu](mailto:dsenesky@stanford.edu)

Prof. Hung-Ta Wang  
University of Alabama,  
Chemical Engineering  
BOX 870203  
Tuscaloosa, AL 35487-0203  
E-mail: [htwang@eng.ua.edu](mailto:htwang@eng.ua.edu)

Dr. Travis J. Anderson  
Naval Research Lab  
Washington D.C.  
E-mail: [travis.anderson@nrl.navy.mil](mailto:travis.anderson@nrl.navy.mil)

Prof. Soohwan Jang  
Dankook University  
Department of Chemical Engineering  
152, Jukjeon-ro, Suji-gu, Yongin-si, Gyeonggi-do, 448-701, Korea  
E-mail: [jangmountain@dankook.ac.kr](mailto:jangmountain@dankook.ac.kr)

Prof. Jihyun Kim  
Korea University

Anam-dong 5-1, Sungbuk-gu  
Seoul 136-701, Korea  
Email: [jhkim@prosys.korea.ac.kr](mailto:jhkim@prosys.korea.ac.kr)

Prof. Luc Stafford  
Département de physique  
Université de Montréal  
2900 Édouard-Montpetit  
Montréal, Québec, Canada  
Pavillon Roger-Gaudry, F-414  
Téléphone : (514) 343-6542  
Télécopieur : (514) 343-2071  
Email: [luc.stafford@umontreal.ca](mailto:luc.stafford@umontreal.ca)

Prof. Jian Liu  
Soochow University  
Institute of Functional Nano & Soft Materials  
Soochow University, Box 32,  
199 Ren-ai Road, Suzhou Industrial Park,  
Suzhou, 215123 P. R. China  
Email: [jliu@suda.edu.cn](mailto:jliu@suda.edu.cn)

Your help is greatly appreciated.

Sincerely,



Yu-Lin Wang,  
Assistant Professor  
Institute of Nanoengineering and Microsystems  
National Tsing Hua University  
Hsinchu, 300, Taiwan, R.O.C.  
Tel: 886-3- 5162405  
Fax: 886-3-574-54554  
E-mail: [ylwang@mx.nthu.edu.tw](mailto:ylwang@mx.nthu.edu.tw)
